# Supplementary material
Source: PubMed Central journal article supplement (PMC2531239)
Supplement: NIHMS61729-supplement-si20061122_115.pdf [file NIHMS61729-supplement-si20061122_115.pdf]

*Supporting information for:*

## **Optical Imaging of Bacterial Infection in Living Mice Using a Fluorescent Near-Infrared Molecular Probe**

W. Matthew Leevy,<sup>a,b</sup> Seth T. Gammon,<sup>c</sup> Hua Jiang,<sup>a,d</sup> James R. Johnson,<sup>a</sup> Dustin J. Maxwell,<sup>c</sup>

Erin N. Jackson,<sup>c</sup> Manuel Marquez,<sup>e,f,g</sup> David Piwnica-Worms,<sup>c</sup> and Bradley D. Smith<sup>a\*</sup>

<sup>a</sup>Department of Chemistry and Biochemistry, 251 Nieuwland Science Hall, University of Notre Dame, Notre Dame, IN 46556. <sup>b</sup>INEST Group Postgraduate Program, Philip Morris USA, 4201 Commerce Rd, Richmond, VA 23234. <sup>c</sup>The Molecular Imaging Center, Mallinckrodt Institute of Radiology, Washington University School of Medicine, 510 South Kingshighway Blvd., Campus Box 8225, St. Louis, MO 63110 USA. <sup>d</sup>Key Laboratory of Photochemistry, Institute of Chemistry, Chinese Academy of Sciences, Beijing 100080, China. <sup>e</sup>NIST Center for Theoretical and Computational Nanosciences, Gaithersburg, MD 20899. <sup>f</sup>Harrington Department Bioengineering, Arizona State University, Tempe, AZ 85287. <sup>g</sup>Research Center, Philip Morris USA, 4201 Commerce Road, Richmond, VA 23234.

\*Email: smith.115@nd.edu

### **Table of Contents**

|                                                 |     |
|-------------------------------------------------|-----|
| 1) Synthesis of <b>1</b> and <b>2</b>           | S2  |
| 2) NMR and LC-MS spectra                        | S4  |
| 3) Spectral properties of <b>1</b> and <b>2</b> | S10 |
| 4) Imaging procedures and MIC measurements      | S11 |



NMR (CDCl<sub>3</sub>, ppm): 167.84, 160.68, 159.54, 158.96, 148.80, 140.42, 136.93, 128.91, 125.74, 123.03, 122.30, 121.79, 115.82, 113.92, 67.77, 59.92, 58.73, 39.95, 27.19, 26.19. Mass (FAB<sup>+</sup>): m/z 708 (M+1).

#### Dye conjugate 4:

Under nitrogen atmosphere, a slurry of NaH (60% in mineral oil, washed with hexane, 9 mg, 1.2 eq.) and DMF (5mL) was added to a stirring solution of **6** (155 mg, 1.1 eq.) in anhydrous DMF at 0 °C. After 30 min the reaction was allowed to warm up to ambient temperature. This solution was added to a solution of **3**<sup>2</sup> (150 mg, 1eq.) in anhydrous DMF. The reaction was stirred for 2 h, then quenched with water. The solvent was evaporated by vacuum at 40 °C. The dye conjugate **4** was purified by column chromatography (silica gel, chloroform/20-30% methanol) to yield 200 mg of a solid. <sup>1</sup>H NMR (CD<sub>3</sub>OD/10% CDCl<sub>3</sub>, ppm): 8.45 (4H, d, J=5Hz), 7.96 (2H, d, J=9.1Hz), 7.85-7.74 (6H, m), 7.62 (4H, d, J=8Hz), 7.26 (4H, m), 7.18 (4H, m), 7.00 (1H, s), 6.90 (4H, m), 6.82 (2H, s), 6.11 (2H, d, J=14Hz), 4.08 (4H, br), 3.98 (2H, t, J=5.4Hz), 3.84 (8H, s), 3.77 (6H, s), 3.68 (4H, s), 3.45 (2H, m), 2.89 (4H, t, J=3.6Hz), 2.74 (4H, br), 1.93 (14H, m), 1.32 (12H, s). <sup>13</sup>C NMR (CD<sub>3</sub>OD/10% CDCl<sub>3</sub>, ppm): 172.46, 168.90, 163.43, 163.30, 160.57, 159.51, 149.35, 143.98, 141.71, 140.51, 138.83, 136.90, 131.01, 129.69, 124.64, 123.94, 122.93, 122.13, 115.73, 115.35, 114.60, 112.70, 109.94, 100.80, 68.59, 60.45, 59.64, 56.45, 51.74, 50.32, 45.05, 40.69, 28.37, 27.80, 27.24, 25.24, 23.49, 22.35. Mass (FAB<sup>+</sup>): m/z 1459 (M+1)<sup>+</sup>; LC-ESMS: single peak at 7.60 min (see Figure S3) with m/z 730.6 (M+2)<sup>2+</sup>.

#### Probe 1:

To a solution of dye conjugate **4** (15 mg) in 10 mL methanol was added zinc nitrate (6 mg, 2.0 equiv.). The solution was stirred at room temperature for 30 min. The solution was evaporated to give the molecular probe **1** without further purification. The <sup>1</sup>H NMR spectrum for probe **1** in water is strongly broadened due to aggregation (see Section 3 below). Photophysical properties of probe **1** in water: Absorption λ<sub>max</sub> = 794 nm, emission λ<sub>max</sub> = 810 nm, ε = 1.1 x 10<sup>5</sup> M<sup>-1</sup>cm<sup>-1</sup>, quantum yield = 0.14. The quantum yield was measured in water at 25 °C using IR-125 as a reference dye with a quantum yield of 0.13 in DMSO.<sup>3</sup>

#### Control fluorophore 2:

The procedure is similar to the preparation of **4**. Condensation of dye **3** (20 mg, 1equiv.), NaH (1 mg, 1.2 eq) and 4-hydroxybenzyl alcohol (4 mg, 1.1 equiv.) generated fluorophore **2** (18 mg). The <sup>1</sup>H NMR spectrum for compound **2** in water is strongly broadened due to aggregation (see Section 3 below). LC-ESMS: single peak at 6.75 min (see Figure S4) with m/z 875.6 (M+1)<sup>+</sup>, 437.6 (M+1)<sup>2+</sup>, 438.6 (M+2)<sup>2+</sup>. Photophysical properties in water: Absorption λ<sub>max</sub> = 787 nm (ε = 1.5 x 10<sup>5</sup> M<sup>-1</sup>cm<sup>-1</sup>), emission λ<sub>max</sub> = 810 nm.

**References:** (1) Lakshmi, C.; Hanshaw, R. G.; Smith, B. D. *Tetrahedron*. **2004**, *60*, 11307-11315.

(2) Narayanan, N.; Patonay, G. *J. Org. Chem.*, **1995**, *60*, 2391-95. (3) Benson, R. C.; Kues, H. *J. Chem. Eng. Data* **1977**, *22*, 379-383.

## 2) NMR and LC-MS spectra

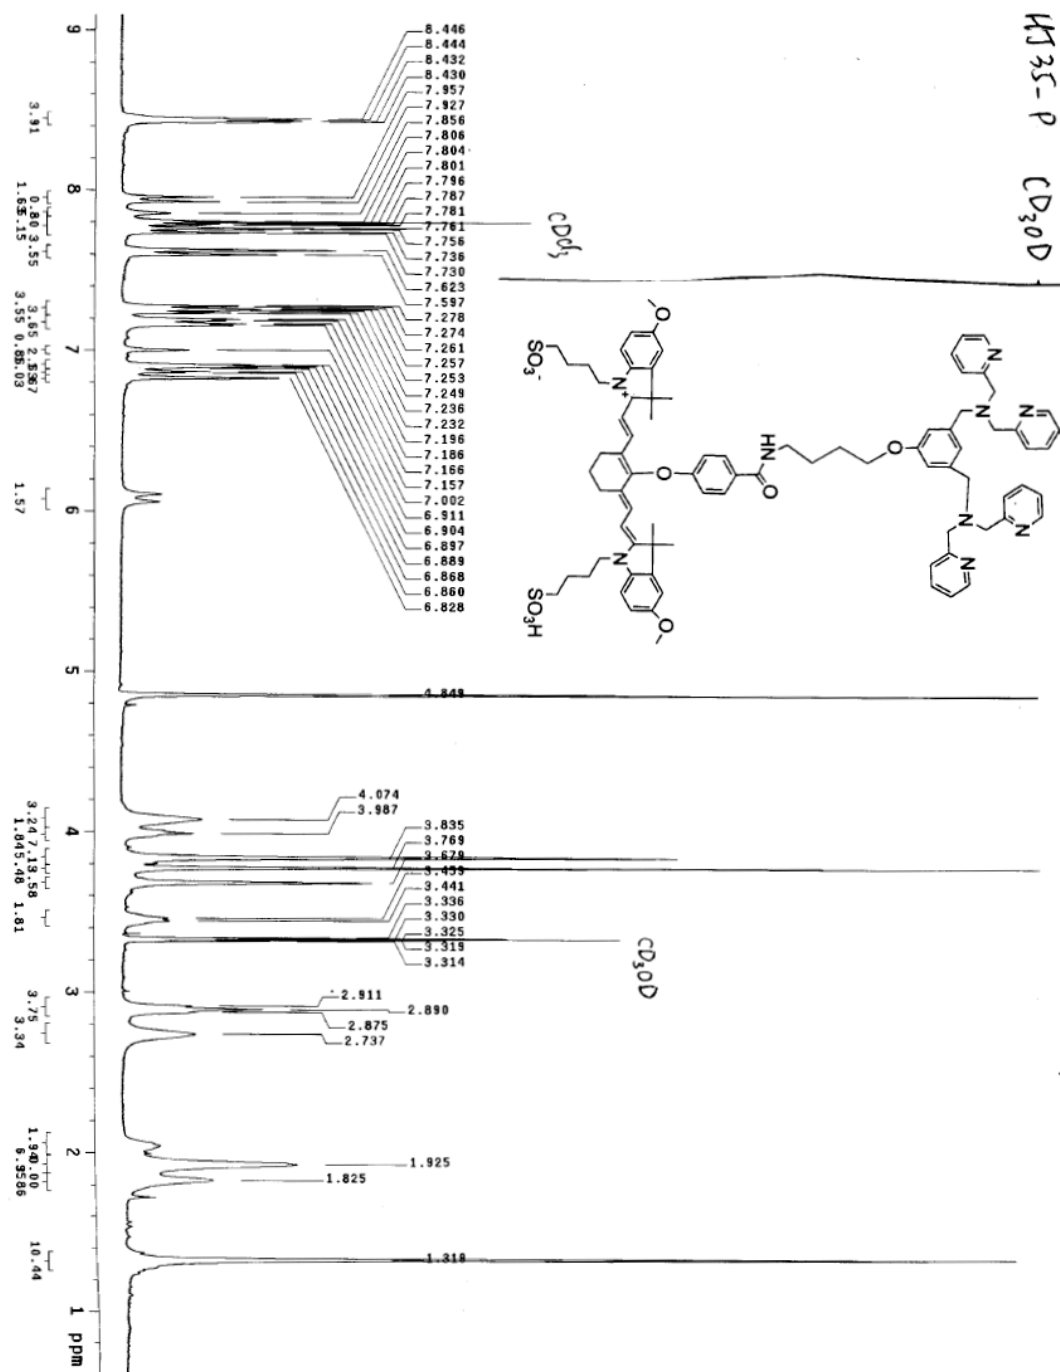

Figure S1. <sup>1</sup>H NMR of 4 in CD<sub>3</sub>OD/10% CDCl<sub>3</sub>.

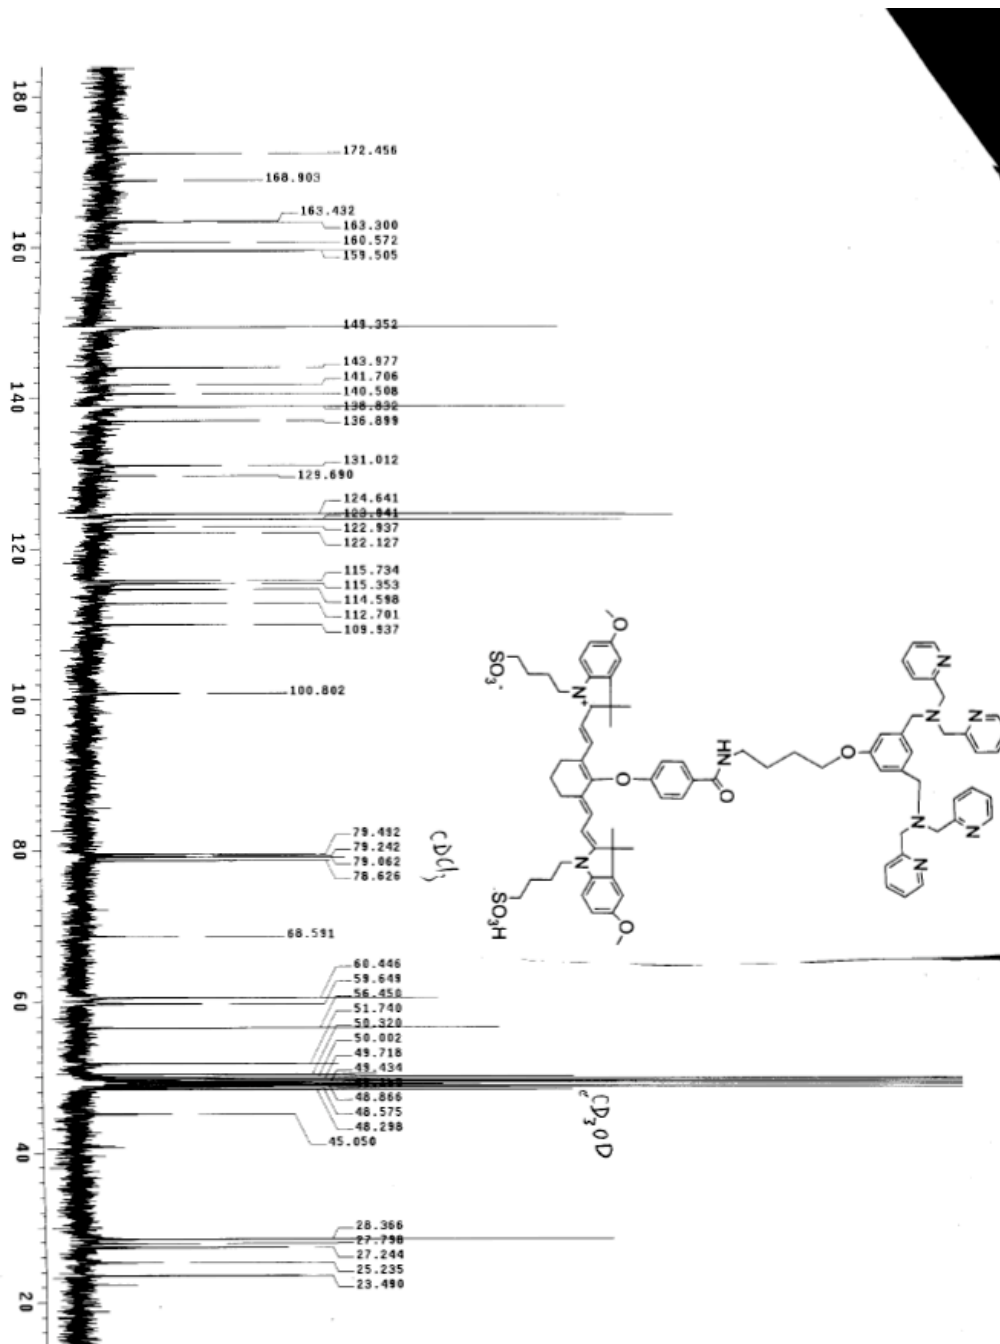

Figure S2. <sup>13</sup>C NMR of **4** in CD<sub>3</sub>OD/10% CDCl<sub>3</sub>.

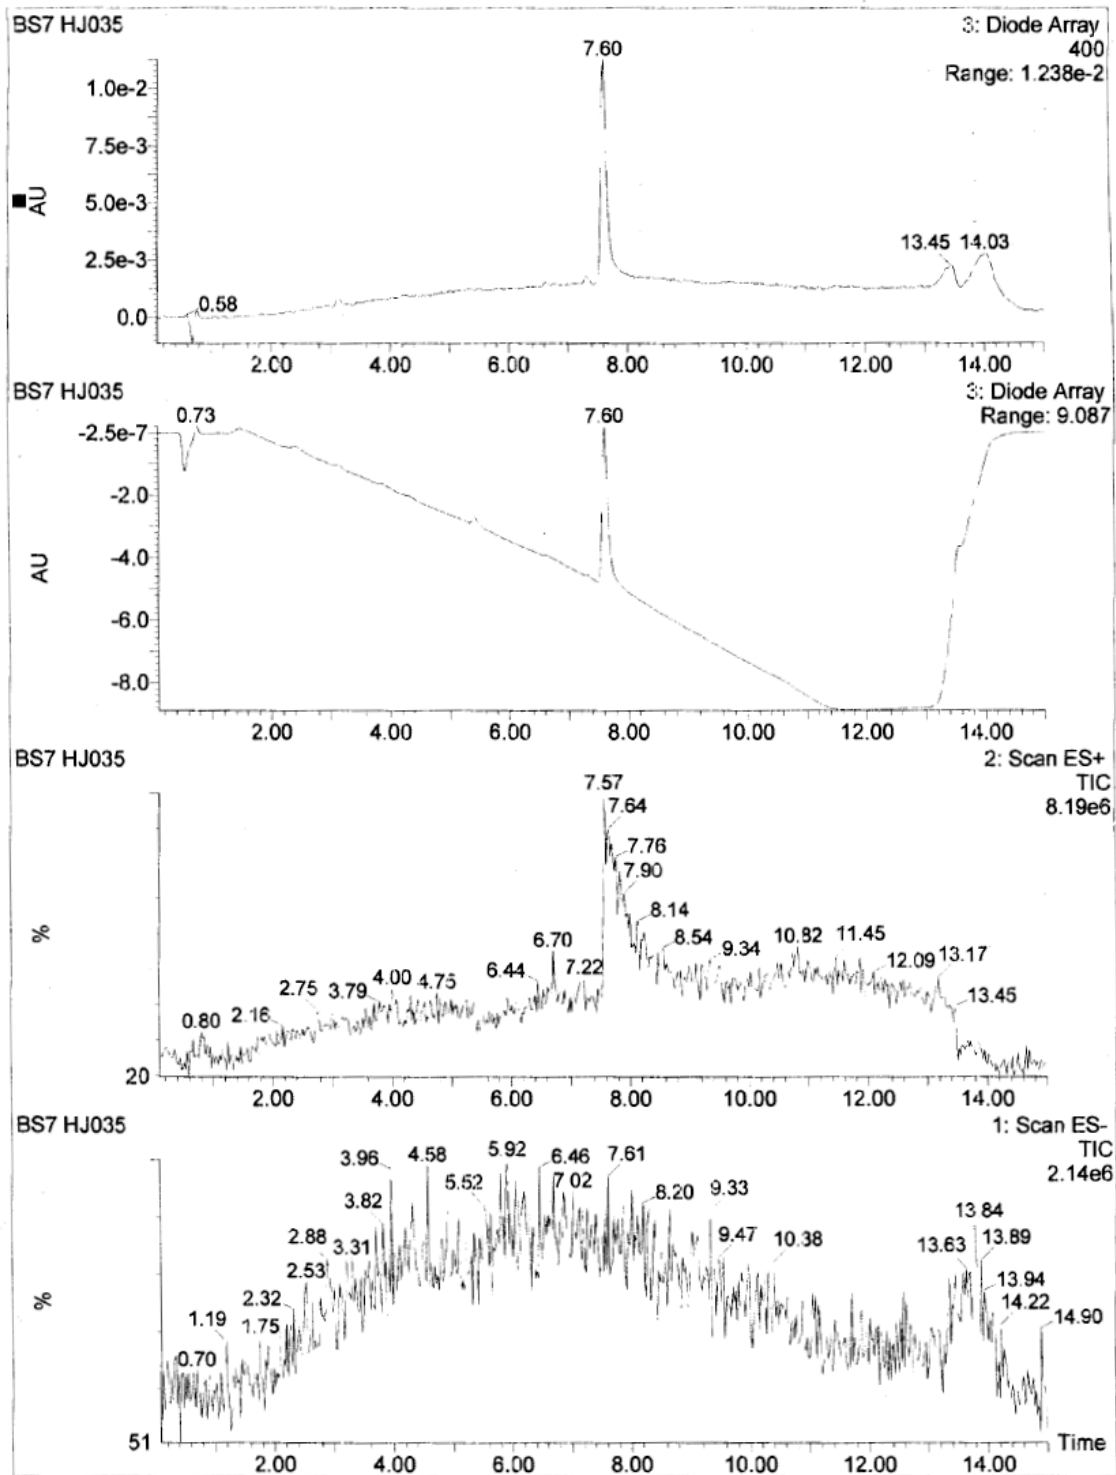

Figure S3a. LC-MS of 4.

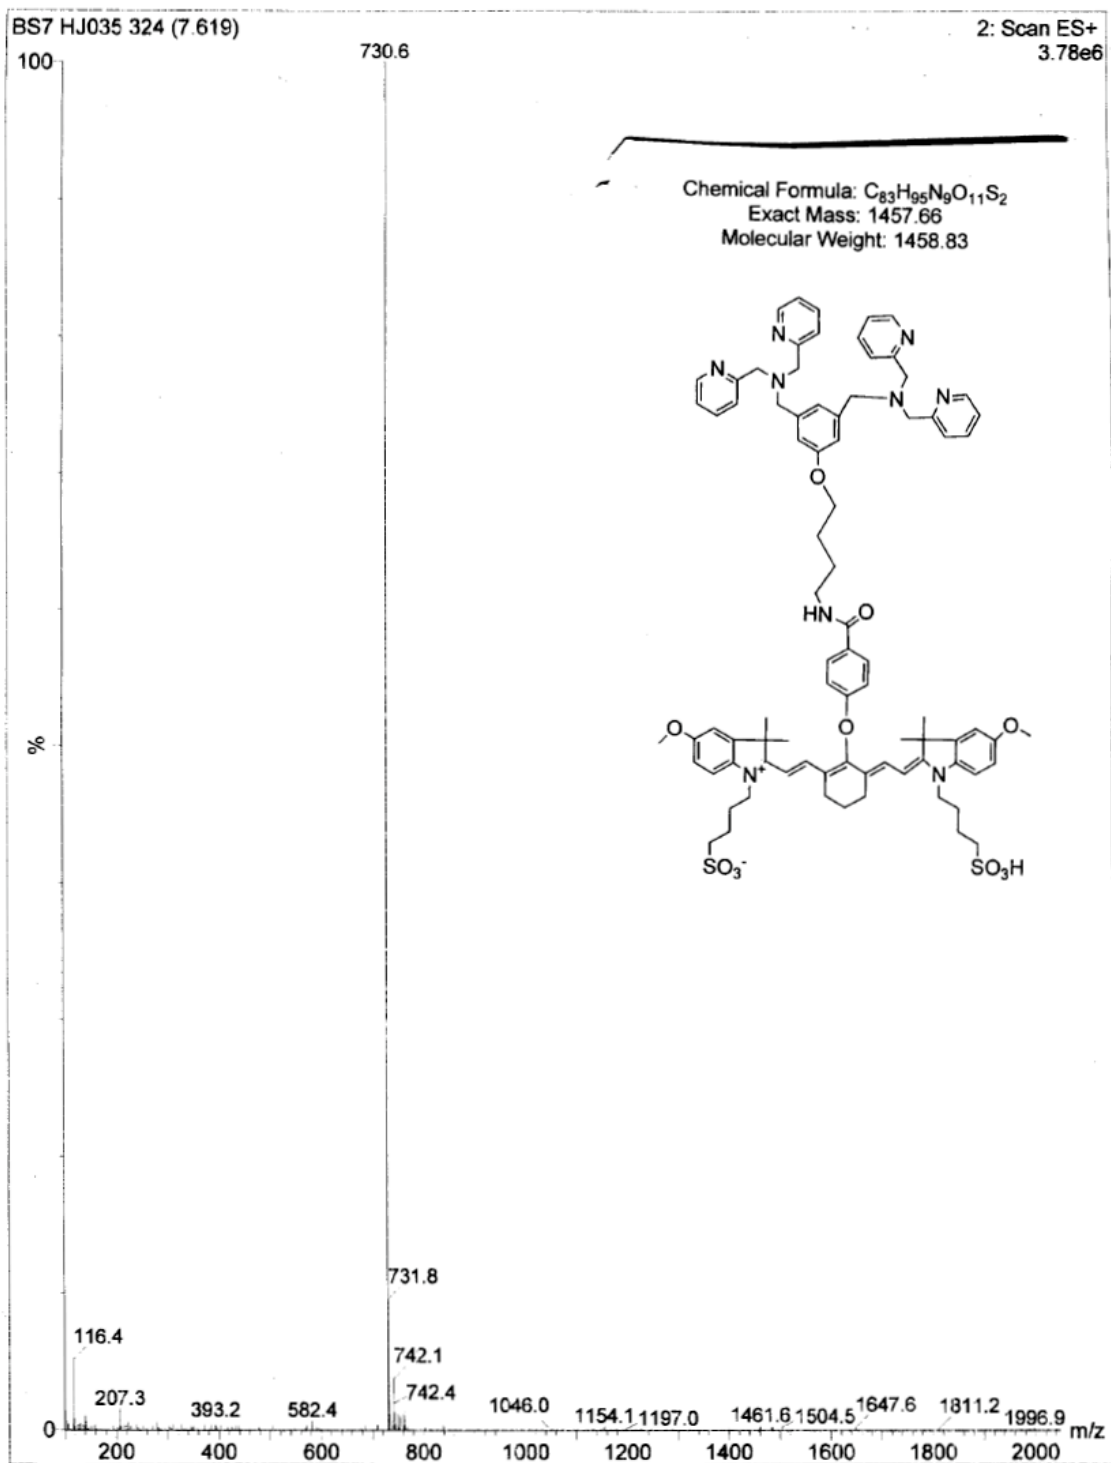

Figure S3b. LC-MS of 4.

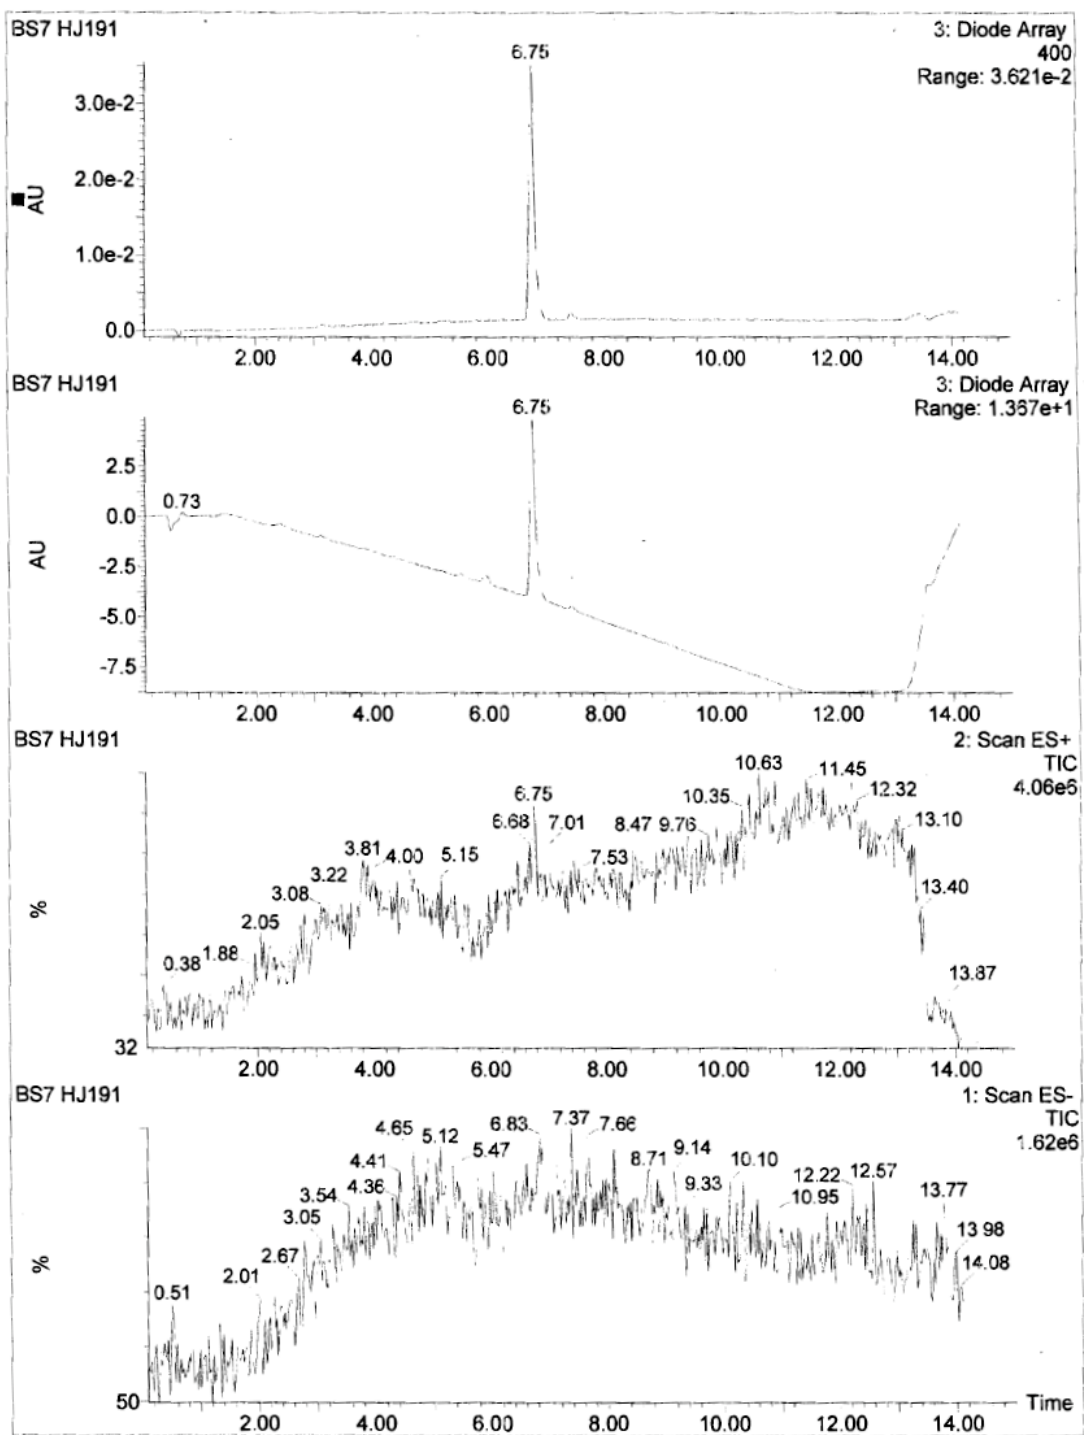

Figure S4a. LC-MS of 2.





### 3) Spectral properties of 1 and 2

Like most cyanine dyes (Mishra et al. *Chem. Rev.* **2000**, *100*, 1973), probe **1** and control fluorophore **2** aggregate in pure water, which induces absorption broadening and modest self-quenching of the fluorescence (Figure S5). This means that the spectral properties of these dyes in pure water may not have much relevance to the spectral properties inside a living animal. For example, fluorescence emission from control fluorophore **2** is higher than probe **1** in pure water (Figure S6); however, addition of anionic liposomes induces a large, 15-fold increase in fluorescence intensity for probe **1** but no intensity change for control fluorophore **2** (Figure S7). We have previously reported on this effect in some detail (Lakshmi et al. *Tetrahedron*, **2004**, *60*, 11307-11315. Koulov et al. *Israel. J. Chem.* **2005**, *45*, 373-379). The emission from most fluorescent Zn-DPA probes increases when they bind to anionic membranes, apparently because of probe de-aggregation, chromophore rigidification, and/or protection from the quenching effects of water. The data in Figure S7 is consistent with the observation in Figure 1 of the paper that probe **1** strongly stains anionic bacterial cell membranes. In contrast, control dye **2** has no measurable affinity for anionic membranes and does not associate with bacterial cells.

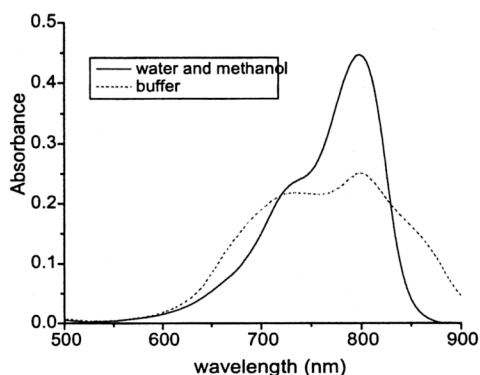

Figure S5. Absorption spectra of probe **1** (5  $\mu\text{M}$ ) in aqueous buffer (pH 7) and in 1:1 water/methanol. The broadened absorption in buffer is due to probe aggregation which induces exciton coupling and a blue-shifted “H-aggregate” band at 710 nm.

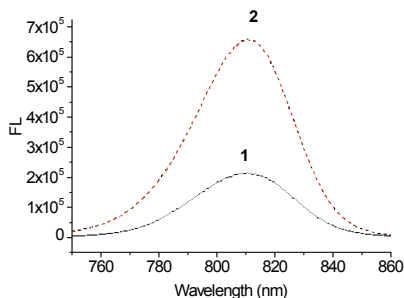

Figure S6. Fluorescence emission of **1** and **2** (1  $\mu\text{M}$ ) in water.  $\lambda_{\text{ex}} = 725 \text{ nm}$ .

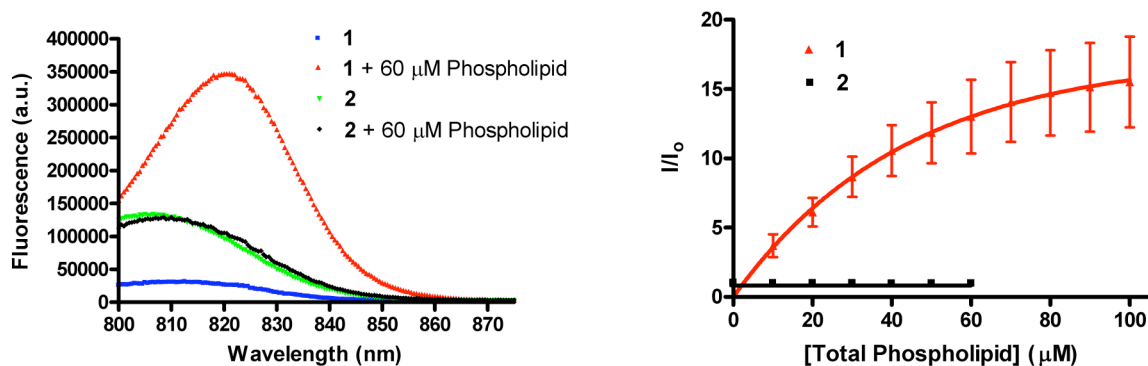

Figure S7. (Left) Fluorescence spectra for probe **1** and control fluorophore **2** in the presence and absence of anionic liposomes composed of POPC:POPG. (Right) Change in fluorescence emission for probe **1** and control fluorophore **2** upon addition of anionic liposomes composed of POPC:POPG.  $\lambda_{\text{ex}} = 750 \text{ nm}$ .

#### 4) Imaging procedures and MIC measurements.

##### 4.1 *In vitro* imaging of bacteria

*S. aureus* NRS11 cells were grown to mid-log phase ( $\text{OD} = 0.5$ ) in Luria Bertani (LB) Miller broth (5 g/L yeast extract, 10 g/L Tryptone, 10g/L NaCl), centrifuged (3500 R.P.M., 3.5 min.) and the pellet resuspended in 1 mL of buffer (5mM TES (N-Tris-(hydroxymethyl)-methyl-2-aminoethanesulfonic acid), 145 mM NaCl, pH = 7.4). Probe **1** or control fluorophore **2** were subsequently added (10  $\mu\text{M}$  final conc.). Bacterial suspensions containing **1** and **2** were allowed to incubate for 10 min., and subsequently washed twice with buffer (as above) to reduce background fluorescence. Images were acquired on a Nikon Eclipse TE2000-U epifluorescence microscope using a 100X objective, 10X ocular and 1.5X optivar to obtain images at 1500X. Near infrared fluorescence images were captured using a Photometrics Cascade 512B CCD and a Cy7 filter set (Exciter HQ710/75x, Dichroic Q750LP, Emitter HQ810/90m).

##### 4.2 *In vivo* imaging of mice injected with pre-labeled bacteria

*S. aureus* NRS11 or *E. coli* UTI89 cells were grown to  $\text{OD}_{600} = 0.5$  in LB media and 1 ml aliquots were treated with either probe **1** or control fluorophore **2** (10  $\mu\text{M}$  final). After incubation for 5 min, the cells were pelleted by centrifugation (17,000 RPM for 30 s) and the supernatant removed. The cells were resuspended in 50  $\mu\text{L}$  of LB, and the resulting suspensions injected into the thigh muscles of nude mice (male, 5-6 week old, Strain NCRNU, Taconic, Hudson, NY). One mouse was given an injection of *S. aureus* and another mouse was injected with *E. coli*. The left thigh of each mouse was injected with cells pre-labeled with probe **1**, while the right side was injected with bacteria that had been pre-incubated with control fluorophore **2**. The mice were imaged using a Kodak 4000MM Imaging Station with the recommended Cy7 filter set (Exciter x720, Emitter e790WA). Images were background subtracted (rolling ball method, 500 pixels) and scaled with *Fire Look-Up Table* using the ImageJ software (v1.36b). The image of a mouse after injection of pre-labeled *E. coli* is given in the left side of Figure S8.

### 4.3 *In vivo* targeting of a bacterial infection with probe 1

The experimental details are described in the text of the paper. Shown in the right side of Figure S8 is targeting of probe 1 to an *E. coli* infection in a living mouse.

Figure S8. *Left*: Optical image of a mouse with intramuscular injections of *E. coli* cells that have been pre-labeled with **1** or **2** (left and right leg, respectively). *Right*: Optical image of a mouse given an intramuscular injection of unlabeled *E. coli* (left leg) followed by an intravenous injection of **1**. Image taken 18 h post injection with **1**. Scale represents relative fluorescence intensity.

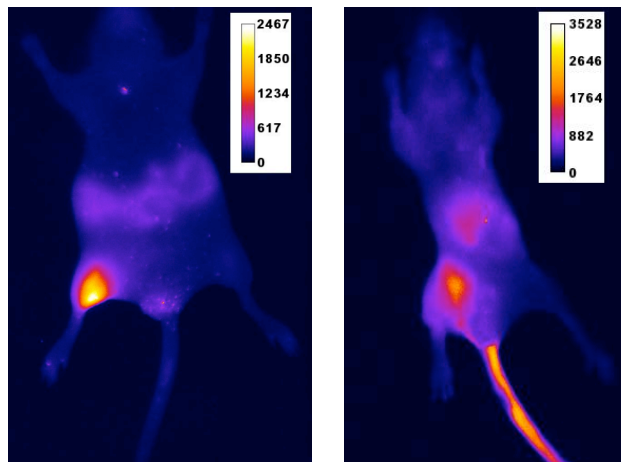

### 4.4 Measurements of MIC

The minimum inhibitory concentration (MIC) is the lowest serial 2-fold dilution that prevents bacterial growth as outlined by the National Committee for Clinical Laboratory Standards (NCCLS). *S. aureus* NRS11 cells were tested using a bacterial load of  $5 \times 10^5$  C. F. U./mL. Cells were grown at 37 °C in 2 mL of Luria Bertani (LB) Miller media (10 g/L peptone, 5 g/L yeast extract, 10 g/L, NaCl) that were 2-fold serially diluted with compound. The MIC is the lowest concentration that inhibited growth after 24 h as judged by visual turbidity. However, there was no inhibition of *S. aureus* growth by probe **1** or control **2** at the maximum tested concentrations of 100  $\mu$ M and 400  $\mu$ M, respectively.

#### 4.5 Tissue distribution of probe 1.

Shown in Figure S9 are fluorescence images of the organs from six athymic nude mice that underwent the imaging procedure described in Figure 2 of the paper. Mice 4-6 had thigh injections of *S. aureus* followed 6 hours later by intravenous injection of probe 1; whereas mice 1-3 are controls that were not infected and did not receive probe 1. Mice 4-6 were sacrificed 21 h after probe 1 injection and dissected immediately. The major organs and tissue were imaged using the Kodak 4000MM Imaging Station. The selective accumulation of probe 1 in the infected thigh is immediately obvious. More minor accumulations of probe 1 are observed in the liver and kidney. The moderately high fluorescent signal from the intestines in all six mice is due to autofluorescence from digested food.

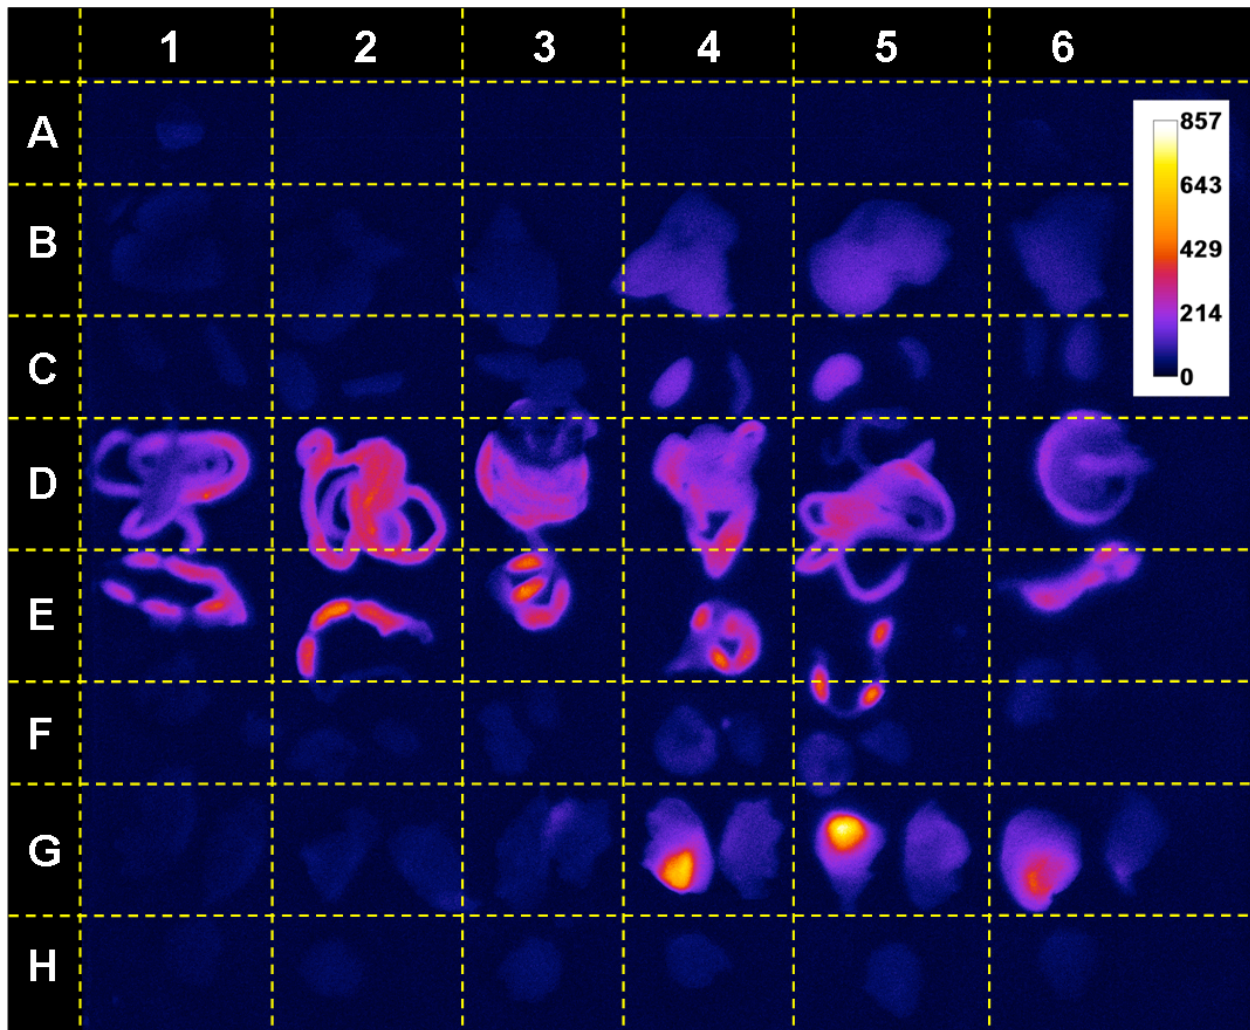

Figure S9. Tissue layout: Row A: Drop of Blood, Row B: Liver, Row C: One Kidney (left) and the Spleen (right),\* Row D: Small Intestine, Row E: Large Intestine, Row F: Lungs (left) and Heart (Right), Row G: Left Rear Thigh Muscle (site of infection) and Right Rear Thigh Muscle, and Row H: Brain. \*Location order of kidney and spleen is reversed for mouse 6.
